# Supplementary material for: Evaluation of Safety and Clinically Relevant Drug–Drug Interactions with Tucatinib in Healthy Volunteers
Source: Springer Nature journal article supplement (doi:10.1007/s40262-022-01144-z), 2022-08-06
Supplement: MOESM1 [file 23342828]

# Evaluation of Safety and Clinically Relevant Drug–Drug Interactions with Tucatinib in Healthy Volunteers

Ariel Topletz-Erickson,1 Anthony Lee,1 Evelyn L. Rustia,1 Hao Sun,1 JoAl G. Mayor,1 Layth I. Abdulrasool,1 Luke Walker,1 Christopher J. Endres,1

1Seagen Inc., Bothell, Washington, USA

**Running header:** Tucatinib DDI Profile

**Correspondence to:**

Christopher J. Endres, PhD

Clinical Pharmacology and Pharmacometrics

Seagen Inc.

21823 30th Drive SE

Bothell, WA 98021

Email: [CEndres@seagen.com](mailto:CEndres@seagen.com)

**Word count**: 4300/4000

**Total number of figures/tables**: 5

**References:** 16

**Keywords:** cytochrome, drug–drug interaction, inducer, inhibitor, tucatinib

# Supplementary Data

1. Tucatinib Inhibits CYP3A, CYP2C8, and P-gp–Mediated Elimination and is Impacted by CYP2C8 Inhibition in Healthy Volunteers

***Ariel Topletz-Erickson, PhD, Anthony Lee, PhD, Evelyn L. Rustia, MD, Hao Sun, PhD, JoAl G. Mayor, PharmD, Layth I. Abdulrasool, MD, Luke Walker, MD, Christopher J. Endres, PhD***

Contents

[Liquid chromatography with tandem mass spectrometry methodology 4](#_Toc100051170)

[Table S1 Bioanalytical reference standards for determining plasma concentrations of tucatinib, concomitant drugs, and metabolites 5](#_Toc100051171)

[Table S2 Participant characteristics 7](#_Toc100051172)

[Table S3 Summary of the pharmacokinetic parameters of tucatinib and ONT-993 following single oral dose administration of tucatinib 300 mg alone (Day 1) and in combination with itraconazole (Day 6) – part A 8](#_Toc100051173)

[Table S4 Summary of the pharmacokinetic parameters of tucatinib and ONT-993 following single oral dose administration of tucatinib 300 mg alone (Day 1) and in combination with rifampin (Day 10) – part B 10](#_Toc100051174)

[Table S5 Summary of the pharmacokinetic parameters of tucatinib and ONT-993 following single oral dose administration of tucatinib 300 mg alone (Day 1) and in combination with gemfibrozil (Day 7) – part C 12](#_Toc100051175)

[Table S6 Pharmacokinetic parameters of midazolam and 1­hydroxymidazolam following oral administration of tolbutamide 500 mg and midazolam 2 mg alone (Day 2) and in combination with steady-state tucatinib (Day 12) – part D 14](#_Toc100051176)

[Table S7 Summary of the pharmacokinetic parameters of repaglinide following oral administration of repaglinide 0.5 mg alone (Day 1) and in combination with steady-state tucatinib (Day 11) – part D 16](#_Toc100051177)

[Table S8 Pharmacokinetic parameters of tolbutamide and 4­hydroxytolbutamide following oral administration of tolbutamide 500 mg and midazolam 2 mg alone (Day 2) and in combination with steady-state tucatinib (Day 12) – part D 17](#_Toc100051178)

[Table S9 Pharmacokinetic parameters of digoxin following oral administration of digoxin 0.5 mg alone (Day 1) and in combination with steady-state tucatinib (Day 15) – part E 19](#_Toc100051179)

[Table S10. Tucatinib-related TEAEs in parts A–E 20](#_Toc100051180)

## Liquid chromatography with tandem mass spectrometry methodology

For separation of tucatinib and ONT-993, an aliquot of the extract was injected onto a LC instrument (Prominence, Shimazdu, 20 Series, Colombia, Maryland). A C18 HPLC column (Luna C18, 50 x 2 mm, 5 µm; Phenomenex, Torrance, California) was used to separate the analytes and the internal standard from interfering compounds that may be present in the sample extract. The autosampler temperature setting was 5°C and the typical back press was 175 bar. The aqueous mobile phase A was 1:100 1 M ammonium formate:water, and the organic mobile phase B was 1:50:50 1 M ammonium formate:acetonitrile:methanol. Flow rate was 1.00 mL/min, and the sample injection volume was 12–20 µl. The rinse volume was 450 µl.

For quantification of tucatinib and ONT-993, an aliquot of the extract was injected onto a mass spectrometer instrument (Sciex API-500, Applied Biosystems, Framingham, Massachusetts). The nebulizer current was 5.0 V and the temperature was 600 °C. Nitrogen was the collision gas, curtain gas, and nebulizing gas. The entrance potential was 10 V. The acquisition time was 3.00 min and the cycle time was approximately 3.25 min. For tucatinib, the transition monitored, dwell time, declustering potential, capillary electrophoresis, collision cell exit potential, and typical retention time was 481.3 → 274.4, 100 ms, 100 V, 65 V, 20 V, and 0.93 (range 0.80–1.00) min, respectively. For ONT-993, the transition monitored, dwell time, declustering potential, capillary electrophoresis, collision cell exit potential, and typical retention time was 497.3 → 275.4, 80 ms, 100 V, 65 V, 20 V, and 0.75 (range 0.65–0.85) min, respectively.

##

## Table S1 Bioanalytical reference standards for determining plasma concentrations of tucatinib, concomitant drugs, and metabolites

| Analyte | Sample Volume | Internal Standard | Validated Limits of Sensitivity | Within/Between-Day Variability: Precision, Coefficient of Variation, %; Accuracy, % Bias |
| --- | --- | --- | --- | --- |
| Tucatinib  (Avista Pharma, East Rutherford, NJ) | 50 µL | Tucatinib-d6  (Cascadian Therapeutics Inc., Seattle, WA) | 1.00 ng/mL to 1000 ng/mL |  |
|  |
| Interrun Precision 3.8% to 6.0% |
| Interrun Accuracy −2.3% to 2.7% |
| ONT-993  (Cascadian Therapeutics Inc., Seattle, WA) | 50 µL | ONT-993-d4  (Cascadian Therapeutics Inc., Seattle, WA) | 1.00 ng/mL to 1000 ng/mL |  |
|  |
| Interrun Precision 2.8% to 6.2% |
| Interrun Accuracy 0.3% to 2.3% |
| Itraconazole  (Toronto Research Chemicals, Toronto, ON) | 100 µL | Itraconazole-d5  (Toronto Research Chemicals, Toronto, ON) | 2.00 ng/mL to 1000 ng/mL | Intrarun Precision 1.2% to 10.3% |
| Intrarun Accuracy −5.3% to 13.5% |
|  |
|  |
| Rifampin  (Sigma-Aldrich Corp., St. Louis, MO) | 25 µL | Rifampin-d4  (TLC Pharmachem, Newmarket, ON) | 50.0 ng/mL to 35 000 ng/mL | Intrarun Precision 1.4% to 7.8% |
| Intrarun Accuracy −0.8% to 10.0% |
| Interrun Precision 2.4% to 5.9% |
| Interrun Accuracy 1.5% to 6.0% |
| Gemfibrozil  (US Pharmacopeia, Rockville, MD) | 50 µL | Gemfibrozil-d6  (Toronto Research Chemicals, Toronto, ON) | 50.0 ng/mL to 25 000 ng/mL | Intrarun Precision 1.2% to 6.5% |
| Intrarun Accuracy −5.6% to 3.0% |
| Interrun Precision 1.9% to 5.8% |
| Interrun Accuracy −3.0% to 2.0% |
| Repaglinide  (US Pharmacopeia, Rockville, MD) | 50 µL | Repaglinide-d5  (Toronto Research Chemicals, Toronto, ON) | 0.100 to 100 ng/mL | – |
| – |
| Interrun Precision 1.4% to 2.6% |
| Interrun Accuracy −6.0% to 1.4% |
| Tolbutamide  (Caymen Chemical Company, Ann Arbor, MI) | 50 µL | Tolbutamide-d9  (Toronto Research Chemicals, Toronto, ON) | 0.100 μg/mL to 100 μg/mL | Intrarun Precision 2.2% to 7.4% |
| Intrarun Accuracy −7.3% to 2.1% |
| Interrun Precision 4.0% to 8.0% |
| Interrun Accuracy −3.6% to -0.3% |
| 4-hydroxytolbutamide  (Toronto Research Chemicals, Toronto, ON) | 50 µL | 4 hydroxy tolbutamide-d9  (Toronto Research Chemicals, Toronto, ON) | 0.0250 μg/mL to 5.00 μg/mL | Intrarun Precision 2.2% to 14.6% |
| Intrarun Accuracy −6.0% to 14.4% |
| Interrun Precision 4.4% to 11.0% |
| Interrun Accuracy −4.0% to 4.5% |
| Midazolam  (Sigma-Aldrich Corp., St. Louis, MO) | 100 µL | Midazolam-d4  (Sigma-Aldrich Corp.**,** St. Louis, MO) | 0.100 ng/mL to 100 ng/mL | Intrarun Precision 0.9% to 7.4% |
| Intrarun Accuracy −1.1% to 8.8% |
| Interrun Precision 3.0% to 6.7% |
| Interrun Accuracy −0.4% to 6.5% |
| 1-hydroxymidazolam  (Cerilliant, Round Rock, TX) | 100 µL | 1 hydroxy midazolam-d4  (Sigma-Aldrich Corp.**,** St. Louis, MO) | 0.100 ng/mL to 100 ng/mL | Intrarun Precision 1.7% to 17.7% |
| Intrarun Accuracy −3.7% to 13.0% |
| Interrun Precision 3.3% to 12.4% |
| Interrun Accuracy 1.7% to 3.0% |
| Digoxin  (Sigma-Aldrich Corp., St. Louis, MO) | 100 µL | Digoxin-d3  (Toronto Research Chemicals, Toronto, ON) | 0.050 ng/mL to 10.0 ng/mL | Intrarun Precision 1.5% to 8.0% |
| Intrarun Accuracy −2.1% to 15.2% |
| Interrun Precision 3.6% to 7.1% |
| Interrun Accuracy 0.1% to 7.4% |

## Table S2 Participant characteristics

| **Demographic Factor** | | **Part A**  ***n* = 28** | **Part B**  ***n* = 28** | **Part C**  ***n* = 28** | **Part D**  ***n* = 17** | **Part E**  ***n* = 13** |
| --- | --- | --- | --- | --- | --- | --- |
| Age (years) | Mean (SD) | 43 (10) | 41 (11) | 47 (13) | 42 (12) | 40 (13) |
| Median (range) | 42 (24-62) | 44 (23-57) | 49 (22-65) | 41 (24-59) | 36 (24-60) |
| Sex  (%) | Male | 22 (79) | 24 (86) | 23 (82) | 14 (82) | 10 (77) |
| Female | 6 (21) | 4 (14) | 5 (18) | 3 (18) | 3 (23) |
| Ethnicity (%) | Hispanic/ Latino | 8 (29) | 19 (68) | 10 (36) | 3 (18) | 9 (69) |
| Not Hispanic/ Latino | 20 (71) | 9 (32) | 18 (64) | 14 (82) | 4 (31) |
| Race  (%) | White | 9 (32) | 24 (86) | 20 (71) | 6 (35) | 8 (62) |
| Black/African American | 17 (61) | 4 (14) | 8 (29) | 10 (59) | 5 (39) |
| Asian | 1 (4) | -- | -- | -- | -- |
| Othera | 1 (4) | -- | -- | 1 (6) | -- |

*SD*, standard deviation.

aIn Part A, the participant’s race was recorded as “multiple”. In Part D, it was recorded as “native Hawaiian or other Pacific Islander.”

## Table S3 Summary of the pharmacokinetic parameters of tucatinib and ONT-993 following single oral dose administration of tucatinib 300 mg alone (Day 1) and in combination with itraconazole (Day 6) – part A

| Parameter | 300 mg Tucatinib *n* = 28 | 300 mg Tucatinib  + 200 mg Itraconazole *n* = 27 | 300 mg Tucatinib *n* = 28 | 300 mg Tucatinib  + 200 mg Itraconazole *n* = 27 |
| --- | --- | --- | --- | --- |
|  | **Tucatinib** | | **ONT-993** | |
| AUC0–last (h*ng/mL)a | 3320 (30.9) | 4400 (35.2) | 482 (33.6) | 754 (29.3) |
| AUC0–last (h*ng/mL)b | 3470 (1070) | 4640 (1450) | 506 (153) | 783 (217) |
| AUC0-inf (h*ng/mL)a | 3350 (31.1) | 4500 (35.6) | 512 (31.4) | 801 (29.6) |
| AUC0-inf (h*ng/mL)b | 3510 (1090) | 4750 (1510) | 535 (154) | 833 (230) |
| %AUCextrapc (%) | 0.968 (0.396-2.96) | 2.33 (0.604-4.53) | 5.76 (1.52-16.5) | 6.19 (2.50-11.0) |
| Cmax (ng/mL)a | 488 (31.5) | 645 (35.3) | 61.7 (35.6) | 125 (38.6) |
| Cmax (ng/mL)b | 511  (160) | 680 (216) | 65.3 (22.2) | 133 (51.0) |
| Tmax (h)c | 3.00 (1.00-6.00) | 2.00 (1.00-4.00) | 2.49 (1.00-6.00) | 2.00 (1.00-4.00) |
| t1/2 (h)b | 7.87 (0.995) | 10.4 (2.25) | 11.7 (2.38) | 14.3 (3.29) |
| CL/F (L/h)a | 89.5 (31.1) | 66.6 (35.6) | – | – |
| CL/F (L/h)b | 93.5 (28.3) | 70.8 (27.4) | – | – |
| MRAUC0-infa | – | – | 0.153 (35.4) | 0.178 (29.5) |
| MRAUC0-infb | – | – | 0.162 (0.060) | 0.186 (0.062) |
| MRCmaxa | – | – | 0.126 (33.7) | 0.193 (33.6) |
| MRCmaxb | – | – | 0.133 (0.045) | 0.204 (0.070) |

*AUC0–last*, area under the concentration-time curve from time 0 to the time of the last quantifiable concentration; *AUC0-inf*, area under the concentration-time curve from time 0 extrapolated to infinity; %*AUCextrap*, percentage of *AUC0-inf*that is due to extrapolation; *CL/F*, apparent total clearance; *Cmax*, maximum observed concentration; *MRAUC0-inf*, metabolic ratio based upon *AUC0-inf*; *MRCma*x, metabolic ratio based upon *Cmax*; *N*, number of subjects; *t1/2*, apparent terminal elimination half-life; *Tmax*, time of maximum observed concentration.

aGeometric mean (geometric coefficient of variation) is presented.
bArithmetic mean (standard deviation) is presented.
cMedian (min, max) is presented.

## Table S4 Summary of the pharmacokinetic parameters of tucatinib and ONT-993 following single oral dose administration of tucatinib 300 mg alone (Day 1) and in combination with rifampin (Day 10) – part B

| Parameter | 300 mg Tucatinib *n* = 28 | 300 mg Tucatinib  + 600 mg Rifampin QD *n* = 28 | 300 mg Tucatinib *n* = 28 | 300 mg Tucatinib  + 600 mg Rifampin QD *n* = 28 |
| --- | --- | --- | --- | --- |
|  | **Tucatinib** | | **ONT-993** | |
| AUC0–last (h*ng/mL)a | 2000 (56.1) | 1040 (41.3) | 414 (55.2) | 311 (54.9) |
| AUC0–last (h*ng/mL)b | 2230 (934) | 1110 (421) | 463 (203) | 350 (183) |
| AUC0-inf (h*ng/mL)a | 2030 (55.3) | 1050 (40.5) | 439 (51.5) | 328 (53.1) |
| AUC0-inf (h*ng/mL)b | 2260 (937) | 1130 (422) | 485 (207) | 367 (184) |
| %AUCextrap(%)c | 0.88 (0.43-3.76) | 1.68 (0.58-4.48) | 4.12 (1.93-16.9) | 4.96 (1.15-9.28) |
| Cmax (ng/mL)a | 302 (69.7) | 191 (52.5) | 42.6 (60.4) | 88.5 (74.1) |
| Cmax (ng/mL)**b** | 350(157) | 213 (97.3) | 48.3 (22.1) | 105 (57.6) |
| Tmax (h)c | 2.00 (1.00-6.00) | 2.00 (1.00-4.03) | 2.00 (1.00-6.00) | 1.00 (1.00-4.03) |
| t1/2 (h)b | 7.98 (1.61) | 7.34 (1.60) | 10.3 (2.34) | 8.25 (3.53) |
| CL/F (L/h)a | 148 (55.3) | 285 (40.5) | – | – |
| CL/F (L/h)b | 173 (121**)** | 308 (136) | – | – |
| MRAUC0-infa | – | – | 0.22 (25.3) | 0.31 (25.5) |
| MRAUC0-infb | – | – | 0.22 (0.06) | 0.32 (0.09) |
| MRCmaxa | – | – | 0.14 (25.6) | 0.46 (32.4) |
| MRCmaxb | – | – | 0.15 (0.04) | 0.49 (0.15) |

*AUC0–last*, area under the concentration-time curve from time 0 to the time of the last quantifiable concentration; *AUC0-inf*, area under the concentration time curve from time 0 extrapolated to infinity; %*AUCextrap*, percentage of *AUC0-inf* that is due to extrapolation; *CL/F*, apparent total clearance; *Cmax*, maximum observed concentration; *MRAUC0-inf*, metabolic ratio based upon *AUC0-inf*; *MRCma*x, metabolic ratio based upon *Cmax*; *N*, number of subjects; *QD*, once daily; *t1/2*, apparent terminal elimination half-life; *Tma*x, time of maximum observed concentration.

aGeometric mean (geometric coefficient of variation) is presented.
bArithmetic mean (standard deviation) is presented.
cMedian (min, max) is presented.

## Table S5 Summary of the pharmacokinetic parameters of tucatinib and ONT-993 following single oral dose administration of tucatinib 300 mg alone (Day 1) and in combination with gemfibrozil (Day 7) – part C

| Parameter | 300 mg Tucatinib *n =* 28 | 300 mg Tucatinib  + 600 mg Gemfibrozil BID *n =* 26 | 300 mg Tucatinib *n =* 28 | 300 mg Tucatinib  + 600 mg Gemfibrozil BID *n =* 26 |
| --- | --- | --- | --- | --- |
|  | **Tucatinib** | | **ONT-993** | |
| AUC0–last (h*ng/mL)a | 2240 (38.7) | 7350 (47.2) | 415 (46.9) | 322 (42.1) |
| AUC0–last (h*ng/mL)b | 2660 (968) | 7960 (2830) | 450 (160) | 343 (105) |
| AUC0-inf (h*ng/mL)a | 2480 (38.5) | 7590 (46.8) | 444 (42.2) | 397 (40.3)d |
| AUC0-inf (h*ng/mL)b | 2650 (985) | 8220 (2970) | 476 (162) | 421 (128)d |
| %AUCextrap (%)c | 1.40 (0.52-7.16) | 2.79 (0.37-8.72) | 4.99 (2.23-28.5) | 16.6 (5.50-29.5)d |
| Cmax (ng/mL)a | 410 (42.3) | 674 (45.5) | 48.7 (60.5) | 15.1 (44.9) |
| Cmax (ng/mL)b | 442 (173) | 720 (217) | 55.4 (26.2) | 16.2 (5.5) |
| Tmax (h)c | 1.00 (0.97-3.03) | 2.00 (1.00-4.00) | 2.00 (0.97-3.07) | 3.00 (1.00-8.00) |
| t1/2 (h)b | 8.70 (1.75) | 9.76 (2.29) | 11.6 (3.42) | 18.7 (5.63) |
| CL/F (L/h)a | 121 (38.5) | 39.5 (46.8) | – | – |
| CL/F (L/h)b | 129 (48.4) | 44.5 (28.8) | – | – |
| MRAUC0-infa | – | – | 0.18 (34.5) | 0.05 (27.9)d |
| MRAUC0-infb | – | – | 0.19 (0.07) | 0.05 (0.01)d |
| MRCmaxa | – | – | 0.12 (27.6) | 0.02 (29.8) |
| MRCmaxb | – | – | 0.12 (0.03) | 0.02 (0.01) |

*AUC0–last*, area under the concentration-time curve from time 0 to the time of the last quantifiable concentration; *AUC0-inf*, area under the concentration time curve from time 0 extrapolated to infinity; %*AUCextrap*, percentage of *AUC0-inf* that is due to extrapolation; *BID*, twice daily; *CL/F*, apparent total clearance; *Cmax*, maximum observed concentration; *MRAUC0-inf*, metabolic ratio based upon *AUC0-inf*; *MRCmax*, metabolic ratio based upon *Cmax*; *N*, number of subjects; *t1/2*, apparent terminal elimination half-life; *Tmax*, time of maximum observed concentration.

aGeometric mean (geometric coefficient of variation) is presented.
bArithmetic mean (standard deviation) is presented.
cMedian (min, max) is presented.
d*n* = 25.

## Table S6 Pharmacokinetic parameters of midazolam and 1­hydroxymidazolam following oral administration of tolbutamide 500 mg and midazolam 2 mg alone (Day 2) and in combination with steady-state tucatinib (Day 12) – part D

| Parameter | 2 mg Midazolam + 500 mg Tolbutamide *n =* 17 | 2 mg Midazolam + 500 mg Tolbutamide + 300 mg Tucatinib BID *n =* 16 | 2 mg Midazolam + 500 mg Tolbutamide *n =* 17 | 2 mg Midazolam + 500 mg Tolbutamide + 300 mg Tucatinib BID *n =* 16 |
| --- | --- | --- | --- | --- |
|  | **Midazolam** | | **1­Hydroxymidazolam** | |
| AUC0–last (h*ng/mL)a | 21.4 (40.5) | 112 (28.4) | 9.55 (33.7) | 8.98 (26.8) |
| AUC0–last (h*ng/mL)b | 22.9 (8.8) | 116 (30.4) | 10.1 (3.5) | 9.3 (2.4) |
| AUC0-inf (h*ng/mL)a | 22.7 (40.1) | 129 (33.3) | 10.5 (32.6) | 10.6 (23.1)d |
| AUC0-inf (h*ng/mL)b | 24.3 (9.3) | 135 (41.4) | 11.0 (3.6) | 10.8 (2.5)d |
| %AUCextrap (%)c | 5.08 (2.41-10.3) | 12.0 (5.82-26.0) | 7.54 (3.55-18.2) | 15.5 (10.0-24.6)d |
| Cmax (ng/mL)a | 8.71 (30.7) | 26.4 (28.2) | 4.44 (37.9) | 2.64 (30.2) |
| Cmax (ng/mL)b | 9.09 (2.78) | 27.4 (8.4) | 4.73 (1.74) | 2.8 (0.9) |
| Tmax (h)c | 1.00 (0.42-1.08) | 1.00 (0.42-1.05) | 1.00 (0.42-1.08) | 1.00 (0.42-1.05) |
| t1/2 (h)b | 5.38 (1.54) | 9.64 (2.57) | 5.37 (2.82) | 8.99 (2.59)e |
| CL/F (L/h)a | 88.2 (40.1) | 15.5 (33.3) | – | – |
| CL/F (L/h)b | 94.8 (39.4) | 16.3 (5.6) | – | – |
| MRAUC0-infa | – | – | 0.46 (40.5) | 0.08 (30.7)d |
| MRAUC0-infb | – | – | 0.50 (0.21) | 0.08 (0.03)d |
| MRCmaxa | – | – | 0.51 (34.8) | 0.10 (30.1) |
| MRCmaxb | – | – | 0.54 (0.20) | 0.10 (0.03) |

*AUC0–last*, area under the concentration-time curve from time 0 to the time of the last quantifiable concentration; *AUC0-inf*, area under the concentration time curve from time 0 extrapolated to infinity; %*AUCextrap*, percentage of *AUC0-inf* that is due to extrapolation; *BID*, twice daily; *CL/F*, apparent total clearance; *Cmax*, maximum observed concentration; *MRAUC0-inf*, metabolic ratio based upon *AUC0-inf*; *MRCmax*, metabolic ratio based upon *Cmax*; *N*, number of subjects; *t1/2*, apparent terminal elimination half-life; *Tmax*, time of maximum observed concentration.

aGeometric mean (geometric coefficient of variation) is presented.
bArithmetic mean (standard deviation) is presented.
cMedian (min, max) is presented.
d*n =* 14.
e*n =* 15

## Table S7 Summary of the pharmacokinetic parameters of repaglinide following oral administration of repaglinide 0.5 mg alone (Day 1) and in combination with steady-state tucatinib (Day 11) – part D

| Parameter | 0.5 mg Repaglinide *n =* 17 | | | 0.5 mg Repaglinide +  300 mg Tucatinib BID *n =* 16 |
| --- | --- | --- | --- | --- |
|  | **Repaglinide** | | | |
| AUC0–last (h*ng/mL)a | 10.5 (34.9) | | | 17.2 (36.1) |
| AUC0–last (h*ng/mL)b | | 11.1 (4.73) | 18.3 (6.77) | |
| AUC0-inf (h*ng/mL)a | 11.1 (33.3)c | | | 17.3 (36.3)d |
| AUC0-inf (h*ng/mL)b | 11.8 (4.77)c | | | 18.4 6.99)d |
| %AUCextrap (%)e | 2.87 (1.55-9.53)c | | | 1.94 (0.97-4.05)d |
| Cmax (ng/mL)a | 7.34 (37.6) | | | 12.3 (40.2) |
| Cmax (ng/mL)b | 7.82 (3.04) | | | 13.3 (6.26) |
| Tmax (h)e | 1.00 (0.42-1.00) | | | 1.00 (0.42-1.08) |
| t1/2 (h)b | 2.19 (1.01)c | | | 1.66 (0.78)d |
| CL/F (L/h)a | 45.0 (33.3)c | | | 28.9 (36.3)d |
| CL/F (L/h)b | 46.9 (12.6)c | | | 30.5 (10.0)d |

*AUC0–last*, area under the concentration-time curve from time 0 to the time of the last quantifiable concentration; *AUC0-inf*, area under the concentration time curve from time 0 extrapolated to infinity; %*AUCextra*p, percentage of *AUC0-inf* that is due to extrapolation; *BID*, twice daily; *CL/F*, apparent total clearance; *Cmax*, maximum observed concentration; *N*, number of subjects; *t1/2*, apparent terminal elimination half-life; *Tmax*, time of maximum observed concentration.

aGeometric mean (geometric coefficient of variation) is presented.
bArithmetic mean (standard deviation) is presented.
c*n =* 16.
d*n =* 15.
eMedian (min, max) is presented.

## Table S8 Pharmacokinetic parameters of tolbutamide and 4­hydroxytolbutamide following oral administration of tolbutamide 500 mg and midazolam 2 mg alone (Day 2) and in combination with steady-state tucatinib (Day 12) – part D

| Parameter | 500 mg Tolbutamide + 2 mg Midazolam (*n =* 17) | 500 mg Tolbutamide + 2 mg Midazolam + 300 mg Tucatinib BID (*n =* 16) | 500 mg Tolbutamide + 2 mg Midazolam (*n =* 17) | 500 mg Tolbutamide + 2 mg Midazolam + 300 mg Tucatinib BID (*n =* 16) |
| --- | --- | --- | --- | --- |
|  | **Tolbutamide** | | **4­hydroxytolbutamide** | |
| AUC0–last (h*ng/mL)a | 693 (27.4) | 713 (30.6) | 8.28 (21.0) | 7.40 (25.7) |
| AUC0–last (h*ng/mL)b | 717 (194) | 745 (237) | 8.45 (1.75) | 7.63 (2.01) |
| AUC0-inf (h*ng/mL)a | 720 (30.9) | 753 (36.6) | 9.06 (20.1) | 8.28 (24.3) |
| AUC0-inf (h*ng/mL)b | 752 (237) | 802 (325) | 9.22 (1.80) | 8.51 (2.06) |
| %AUCextrap (%)c | 2.12 (0.77-12.2) | 3.04 (1.10-22.0) | 4.71 (2.63-22.2) | 7.29 (2.92-26.3) |
| Cmax (ng/mL)a | 46.9 (16.9) | 44.8 (14.9) | 0.55 (30.4) | 0.48 (35.4) |
| Cmax (ng/mL)b | 47.5 (8.09) | 45.2 (6.52) | 0.57 (0.17) | 0.50 (0.16) |
| Tmax (h)c | 4.00 (2.00-6.10) | 4.03 (2.00-8.05) | 6.00 (3.00-10.03) | 6.00 (4.00-10.03) |
| t1/2 (h)b | 9.13 (2.61) | 10.3 (3.76) | 9.53 (3.20) | 11.2 (4.77) |
| CL/F (L/h)a | 0.70 (30.9) | 0.66 (36.6) | – | – |
| CL/F (L/h)b | 0.72 (0.21) | 0.70 (0.22) | – | – |
| MRAUC0-infa | – | – | 0.01 (38.0) | 0.01 (42.9) |
| MRAUC0-infb | – | – | 0.01 (0.00) | 0.01 (0.00) |
| MRCmaxa | – | – | 0.01 (37.7) | 0.01 (40.1) |
| MRCmaxb | – | – | 0.01 (0.00) | 0.01 (0.00) |

*AUC0–last*, area under the concentration-time curve from time 0 to the time of the last quantifiable concentration; *AUC0-inf*, area under the concentration time curve from time 0 extrapolated to infinity; %*AUCextrap*, percentage of *AUC0-inf* that is due to extrapolation; *BID*, twice daily; *CL/F*, apparent total clearance; *Cmax*, maximum observed concentration; *MRAUC0-inf*, metabolic ratio based upon *AUC0-inf*; *MRCmax*, metabolic ratio based upon *Cmax*; *N*, number of subjects; *t1/2*, apparent terminal elimination half-life; *Tmax*, time of maximum observed concentration.

aGeometric mean (geometric coefficient of variation) is presented.
bArithmetic mean (standard deviation) is presented.
cMedian (min, max) is presented.

## Table S9 Pharmacokinetic parameters of digoxin following oral administration of digoxin 0.5 mg alone (Day 1) and in combination with steady-state tucatinib (Day 15) – part E

| Parameter | 0.5 mg Digoxin (*n =* 13) | 0.5 mg Digoxin + 300 mg Tucatinib BID (*n =* 13) |
| --- | --- | --- |
|  | **Digoxin** | |
| AUC0–last (h*ng/mL)a | 28.2 (35.9) | 43.2 (16.8) |
| AUC0–last (h*ng/mL)b | 29.9 (11.0) | 43.8 (7.69) |
| AUC0-inf (h*ng/mL)a | 32.6 (33.5) | 47.7 (14.9) |
| AUC0-inf (h*ng/mL)b | 34.4 (12.2) | 48.2 (7.46) |
| %AUCextrap (%)c | 14.1 (5.05-19.4) | 8.18 (5.53-15.1) |
| Cmax (ng/mL)a | 1.84 (44.6) | 4.31 (30.3) |
| Cmax (ng/mL)b | 1.99 (0.83) | 4.50 (1.39) |
| Tmax (h)c | 1.00 (0.50-2.08) | 1.00 (0.50-1.13) |
| t1/2 (h)b | 42.5 (10.5) | 43.5 (6.77) |
| CL/F (L/h)a | 15.3 (33.5) | 10.5 (14.9) |
| CL/F (L/h)a | 16.0 (4.80) | 10.6 (1.50) |

*AUC0–last*, area under the concentration-time curve from time 0 to the time of the last quantifiable concentration; *AUC0-inf*, area under the concentration time curve from time 0 extrapolated to infinity; %*AUCextrap*, percentage of *AUC0-inf* that is due to extrapolation; *BID*, twice daily; *CL/F*, apparent total clearance; *Cmax*, maximum observed concentration; *N*, number of subjects; *t1/2*, apparent terminal elimination half-life; *Tmax*, time of maximum observed concentration.

aMedian (min, max).
bArithmetic mean (standard deviation) is presented. All other data are geometric mean (coefficient of variation).
cMedian (min, max) is presented.

## Table S10. Tucatinib-related TEAEs in parts A–E

| TEAE/Grade | | Part A  *n =* 28 | Part B  *n =* 28 | Part C  *n =* 28 | Part D  *n =* 17 | Part E  *n =* 13 |
| --- | --- | --- | --- | --- | --- | --- |
| Participants, n (%) | | | | |
| All TEAEs Related to TUC | G1 | 1 (3.6) | 3 (10.7) | 2 (7.1) | 2 (11.8) | 7 (53.8) |
| G2 | – | – | 1 (3.6) | 1 (5.9) | 1 (7.7) |
| Diarrhea | G1/G2 | 1 (3.6) | – | – | – | 1 (7.7) |
| Dry skin | G1/G2 | – | 1 (3.6) | – | – | 1 (7.7) |
| Pruritus | G1/G2 | – | – | – | 1 (5.9) | 1 (7.7) |
| Gout | G1/G2 | – | – | 1 (3.6) | – | – |
| Arthralgia | G1/G2 | – | – | 1 (3.6) | – | – |
| Headache | G1/G2 | – | – | 1 (3.6) | – | 1 (7.7) |
| Dizziness | G1/G2 | – | – | – | – | 1 (7.7) |
| Blood Creatinine Increased | G1/G2 | – | 1 (3.6) | – | 1 (5.9) | 5 (38.5) |
| ALT Increased | G1/G2 | – | – | – | 1 (5.9) | 4 (30.8) |
| AST Increased | G1/G2 | – | – | – | – | 2 (15.4) |
| Blood Bilirubin Increased | G1/G2 | – | 1 (3.6) | – | – | – |

*ALT*, alanine aminotransferase; *AST*, aspartate aminotransferase; *G*, Grade; *TEAE*, treatment-emergent adverse event; *TUC*, tucatinib.
